# Supplementary material for: MED16 Promotes Tumour Progression and Tamoxifen Sensitivity by Modulating Autophagy through the mTOR Signalling Pathway in ER-Positive Breast Cancer
Source: MDPI journal article supplement (doi:10.3390/life12101461), 2022-09-20
Supplement: s1 [file s1]

| R              |                  | Risk ratio (RR) |                             |       | Statistical tests     |         |           |         |              |         |
|----------------|------------------|-----------------|-----------------------------|-------|-----------------------|---------|-----------|---------|--------------|---------|
| Process groups | Reference groups | HR              | confidence interval (95%CI) |       | Likelihood ratio test |         | Wald test |         | logrank test |         |
|                |                  |                 | Lower                       | Upper | W value               | P value | W value   | P value | W value      | P value |
| H              | L                | 4.13            | 2.84                        | 5.99  | 51.03                 | 9.1e-13 | 55.31     | 1.0e-13 | 64.87        | 8.0e-16 |
